# Supplementary material
Source: Elsevier journal article supplement (http://library.osu.edu/sites/msa/suppmat/v248.i2.pp146-152/mmc1.pdf)
Supplement: mmc1 [file mmc1.pdf]

## **Microwave and submillimeterwave spectra of CH<sub>2</sub>DI and CHD<sub>2</sub>I**

F. Willaert<sup>a</sup>, L. Margulès<sup>a</sup>, K. Kyllönen<sup>b</sup>, A.-M. Ahonen<sup>b</sup>, H. Sarkkinen<sup>b</sup>, S. Alanko<sup>b</sup>, H. Mäder<sup>c</sup>, J. Demaison<sup>a,\*</sup>

<sup>a</sup> Laboratoire de Physique des Lasers, Atomes et Molécules, UMR CNRS 8523, Université de Lille I, 59655 Villeneuve d'Ascq Cedex, France

<sup>b</sup> Department of Physical Sciences, PO Box 3000, FIN-90014 University of Oulu, Finland

<sup>c</sup> Institut für Physikalische Chemie der Universität Kiel, Olshausenstr.40, 24098 Kiel, Germany

**Supplementary material**

Table S1. Observed transitions with hyperfine structure of CH2DI in its ground state.

| J+1 | Ka | Kc | F1'  | F'   | J | Ka | Kc | F1   | F    | Obs[MHz]   | Obs.-Calc.[MHz] |
|-----|----|----|------|------|---|----|----|------|------|------------|-----------------|
| 1   | 0  | 1  | 5/2  | 3/2  | 0 | 0  | 0  | 5/2  | 3/2  | 13557.5270 | -0.0017         |
| 1   | 0  | 1  | 5/2  | 7/2  | 0 | 0  | 0  | 5/2  | 7/2  | 13557.5360 | 0.0004          |
| 1   | 0  | 1  | 5/2  | 5/2  | 0 | 0  | 0  | 5/2  | 5/2  | 13557.5510 | -0.0008         |
| 1   | 0  | 1  | 7/2  | 7/2  | 0 | 0  | 0  | 5/2  | 5/2  | 13962.2080 | 0.0014          |
| 1   | 0  | 1  | 7/2  | 9/2  | 0 | 0  | 0  | 5/2  | 7/2  | 13962.2170 | -0.0030         |
| 1   | 0  | 1  | 7/2  | 5/2  | 0 | 0  | 0  | 5/2  | 3/2  | 13962.2250 | 0.0010          |
| 1   | 0  | 1  | 3/2  | 3/2  | 0 | 0  | 0  | 5/2  | 5/2  | 14136.9820 | -0.0032         |
| 1   | 0  | 1  | 3/2  | 5/2  | 0 | 0  | 0  | 5/2  | 7/2  | 14136.9910 | 0.0022          |
| 1   | 0  | 1  | 3/2  | 1/2  | 0 | 0  | 0  | 5/2  | 3/2  | 14136.9910 | -0.0006         |
| 2   | 0  | 2  | 1/2  | 3/2  | 1 | 0  | 1  | 3/2  | 5/2  | 27844.0700 | -0.0085         |
| 2   | 0  | 2  | 5/2  | 7/2  | 1 | 0  | 1  | 5/2  | 7/2  | 27902.7250 | 0.0191          |
| 2   | 0  | 2  | 3/2  | 1/2  | 1 | 0  | 1  | 5/2  | 3/2  | 28175.4450 | 0.0037          |
| 2   | 0  | 2  | 5/2  | 3/2  | 1 | 0  | 1  | 3/2  | 3/2  | 27323.2640 | 0.0110          |
| 2   | 0  | 2  | 7/2  | 9/2  | 1 | 0  | 1  | 7/2  | 9/2  | 27398.0020 | 0.0010          |
| 2   | 0  | 2  | 5/2  | 7/2  | 1 | 0  | 1  | 7/2  | 9/2  | 27398.0410 | 0.0194          |
| 2   | 0  | 2  | 3/2  | 5/2  | 1 | 0  | 1  | 3/2  | 5/2  | 27596.0060 | 0.0152          |
| 2   | 0  | 2  | 9/2  | 11/2 | 1 | 0  | 1  | 7/2  | 9/2  | 27770.0770 | 0.0035          |
| 2   | 0  | 2  | 7/2  | 7/2  | 1 | 0  | 1  | 5/2  | 7/2  | 27802.6870 | 0.0048          |
| 2   | 1  | 1  | 7/2  | 7/2  | 1 | 1  | 0  | 5/2  | 7/2  | 27556.9530 | 0.0041          |
| 2   | 1  | 1  | 5/2  | 7/2  | 1 | 1  | 0  | 5/2  | 7/2  | 27603.6450 | 0.0035          |
| 2   | 1  | 1  | 3/2  | 5/2  | 1 | 1  | 0  | 5/2  | 7/2  | 27744.0960 | 0.0007          |
| 2   | 1  | 1  | 7/2  | 9/2  | 1 | 1  | 0  | 7/2  | 9/2  | 27761.1370 | -0.0172         |
| 2   | 1  | 1  | 5/2  | 7/2  | 1 | 1  | 0  | 7/2  | 9/2  | 27807.5660 | 0.0147          |
| 2   | 1  | 1  | 5/2  | 3/2  | 1 | 1  | 0  | 3/2  | 3/2  | 27896.0260 | 0.0354          |
| 2   | 1  | 1  | 9/2  | 11/2 | 1 | 1  | 0  | 7/2  | 9/2  | 27943.7490 | 0.0017          |
| 2   | 1  | 1  | 3/2  | 5/2  | 1 | 1  | 0  | 3/2  | 3/2  | 28036.4480 | 0.0087          |
| 2   | 1  | 1  | 1/2  | 3/2  | 1 | 1  | 0  | 3/2  | 5/2  | 28156.7450 | 0.0175          |
| 2   | 1  | 2  | 7/2  | 7/2  | 1 | 1  | 1  | 5/2  | 7/2  | 27362.8260 | -0.0049         |
| 2   | 1  | 2  | 5/2  | 7/2  | 1 | 1  | 1  | 5/2  | 7/2  | 27409.6890 | -0.0128         |
| 2   | 1  | 2  | 3/2  | 5/2  | 1 | 1  | 1  | 5/2  | 7/2  | 27550.7010 | 0.0095          |
| 2   | 1  | 2  | 7/2  | 9/2  | 1 | 1  | 1  | 7/2  | 9/2  | 27566.2980 | 0.0334          |
| 2   | 1  | 2  | 5/2  | 7/2  | 1 | 1  | 1  | 7/2  | 9/2  | 27613.1480 | 0.0207          |
| 2   | 1  | 2  | 5/2  | 7/2  | 1 | 1  | 1  | 3/2  | 5/2  | 27700.9480 | 0.0093          |
| 2   | 1  | 2  | 9/2  | 11/2 | 1 | 1  | 1  | 7/2  | 9/2  | 27749.5670 | 0.0222          |
| 2   | 1  | 2  | 3/2  | 5/2  | 1 | 1  | 1  | 3/2  | 5/2  | 27841.9500 | 0.0216          |
| 2   | 1  | 2  | 1/2  | 3/2  | 1 | 1  | 1  | 3/2  | 5/2  | 27962.6450 | 0.0252          |
| 10  | 0  | 10 | 19/2 | 21/2 | 9 | 1  | 9  | 17/2 | 19/2 | 28804.3160 | -0.0020         |
| 10  | 0  | 10 | 17/2 | 19/2 | 9 | 1  | 9  | 15/2 | 17/2 | 28807.1210 | 0.0067          |
| 10  | 0  | 10 | 21/2 | 23/2 | 9 | 1  | 9  | 19/2 | 21/2 | 28808.3260 | 0.0125          |
| 10  | 0  | 10 | 23/2 | 25/2 | 9 | 1  | 9  | 21/2 | 23/2 | 28816.1410 | 0.0039          |
| 10  | 0  | 10 | 15/2 | 17/2 | 9 | 1  | 9  | 13/2 | 15/2 | 28818.8260 | -0.0105         |
| 10  | 0  | 10 | 25/2 | 27/2 | 9 | 1  | 9  | 23/2 | 25/2 | 28824.0710 | -0.0082         |

Table S2. Observed transitions with hyperfine structure of CHD2I in its ground state.

| J+1 | Ka | Kc | F'  | J | Ka | Kc | F   | Obs[MHz]   | Obs.-Calc.[MHz] |
|-----|----|----|-----|---|----|----|-----|------------|-----------------|
| 1   | 0  | 1  | 5/2 | 0 | 0  | 0  | 5/2 | 12597.3890 | -0.0030         |
| 1   | 0  | 1  | 7/2 | 0 | 0  | 0  | 5/2 | 13001.7750 | -0.0018         |
| 1   | 0  | 1  | 3/2 | 0 | 0  | 0  | 5/2 | 13176.5390 | 0.0001          |
| 2   | 0  | 2  | 5/2 | 1 | 0  | 0  | 3/2 | 25402.7410 | -0.0058         |
| 2   | 0  | 2  | 7/2 | 1 | 0  | 0  | 7/2 | 25477.2720 | -0.0044         |
| 2   | 0  | 2  | 5/2 | 1 | 0  | 0  | 7/2 | 25577.5050 | -0.0040         |
| 2   | 0  | 2  | 3/2 | 1 | 0  | 0  | 3/2 | 25675.1100 | -0.0005         |
| 2   | 0  | 2  | 9/2 | 1 | 0  | 0  | 7/2 | 25849.1130 | 0.0085          |
| 2   | 0  | 2  | 7/2 | 1 | 0  | 0  | 5/2 | 25881.6610 | -0.0001         |
| 2   | 0  | 2  | 1/2 | 1 | 0  | 0  | 3/2 | 25923.0490 | -0.0001         |
| 2   | 0  | 2  | 5/2 | 1 | 0  | 0  | 5/2 | 25981.8910 | -0.0027         |
| 2   | 0  | 2  | 3/2 | 1 | 0  | 0  | 5/2 | 26254.2560 | -0.0013         |
| 2   | 1  | 1  | 7/2 | 1 | 1  | 0  | 5/2 | 25636.8920 | -0.0165         |
| 2   | 1  | 1  | 5/2 | 1 | 1  | 0  | 5/2 | 25683.6590 | -0.0141         |
| 2   | 1  | 1  | 3/2 | 1 | 1  | 0  | 5/2 | 25824.7550 | 0.0228          |
| 2   | 1  | 1  | 7/2 | 1 | 1  | 0  | 7/2 | 25840.3850 | -0.0042         |
| 2   | 1  | 1  | 5/2 | 1 | 1  | 0  | 7/2 | 25887.1380 | -0.0158         |
| 2   | 1  | 1  | 5/2 | 1 | 1  | 0  | 3/2 | 25975.0290 | -0.0030         |
| 2   | 1  | 1  | 9/2 | 1 | 1  | 0  | 7/2 | 26023.2530 | -0.0055         |
| 2   | 1  | 1  | 3/2 | 1 | 1  | 0  | 3/2 | 26116.0900 | -0.0011         |
| 2   | 1  | 1  | 1/2 | 1 | 1  | 0  | 3/2 | 26236.4900 | -0.0059         |
| 2   | 1  | 2  | 7/2 | 1 | 1  | 1  | 5/2 | 25441.8340 | 0.0035          |
| 2   | 1  | 2  | 5/2 | 1 | 1  | 1  | 5/2 | 25488.4270 | 0.0063          |
| 2   | 1  | 2  | 3/2 | 1 | 1  | 1  | 5/2 | 25629.1170 | 0.0210          |
| 2   | 1  | 2  | 7/2 | 1 | 1  | 1  | 7/2 | 25645.9200 | -0.0122         |
| 2   | 1  | 2  | 5/2 | 1 | 1  | 1  | 7/2 | 25692.5140 | -0.0044         |
| 2   | 1  | 2  | 5/2 | 1 | 1  | 1  | 3/2 | 25780.6070 | -0.0141         |
| 2   | 1  | 2  | 9/2 | 1 | 1  | 1  | 7/2 | 25828.2240 | 0.0091          |
| 2   | 1  | 2  | 3/2 | 1 | 1  | 1  | 3/2 | 25921.3000 | 0.0036          |
| 2   | 1  | 2  | 1/2 | 1 | 1  | 1  | 3/2 | 26041.2190 | 0.0118          |

Table S3. Observed rotational transitions of CH2DI in its ground state.

```

*****
*
*           THE CHARACTERISTICS OF THE FIT ARE
*
*   NUMBER OF DATA POINTS      33053
*   NUMBER OF CONSTANTS         12
*   DEGREES OF FREEDOM         33041
*
*   CHISQUARE      N      STD      WEIGHT
*   rotational     333.7   135     .07740   1.000
*   GSCD-v3        5400.1  5221   6.31950  0.026
*   GSCD-v6sprime  18354.4 17491  4.63337  0.049
*   GSCD-v6dprime  11018.1 10206  4.17792  0.062
*   TOTAL          35106.4 33053   .78257
*   VARIANCE       1.0308
*
*****

```

```

*****
*
*   CALC.DATA   OBS.DATA   OBS-CALC   OBS.ERROR   CALC.ERROR   IDENTIFICATION
*
*****

```

|    | CALC.DATA     | OBS.DATA      | OBS-CALC | OBS.ERROR | CALC.ERROR | J' | Ka | Kc | J'' | Ka | Kc |    |  |         |
|----|---------------|---------------|----------|-----------|------------|----|----|----|-----|----|----|----|--|---------|
| 1  | 27630.733528  | 27630.717000  | -.016528 | .0300     | .00079     | 2  | 1  | 2  | 0   | 1  | 1  | 0  |  | +       |
| 2  | 27825.015743  | 27825.010000  | -.005743 | .0290     | .00079     | 2  | 1  | 1  | 0   | 1  | 1  | 0  |  | +       |
| 3  | 27728.112025  | 27728.093000  | -.019025 | .0300     | .00079     | 2  | 0  | 2  | 0   | 1  | 0  | 1  |  | -       |
| 4  | 28814.251857  | 28814.334000  | .082143  | .0340     | .00494     | 10 | 0  | 10 | 0   | 9  | 1  | 9  |  | *****   |
| 5  | 28064.715115  | 28064.676000  | -.039115 | .0300     | .00467     | 5  | 1  | 5  | 0   | 6  | 0  | 6  |  | ----    |
| 6  | 33711.138255  | 33711.036000  | -.102255 | .0300     | .01310     | 20 | 2  | 19 | 0   | 21 | 1  | 20 |  | *****   |
| 7  | 31301.909439  | 31301.860000  | -.049439 | .0430     | .01316     | 22 | 2  | 20 | 0   | 23 | 1  | 23 |  | ---     |
| 8  | 30670.625395  | 30670.703000  | .077605  | .0440     | .01419     | 28 | 1  | 28 | 0   | 27 | 2  | 25 |  | +++++++ |
| 9  | 35206.450116  | 35206.335000  | -.115116 | .0930     | .02184     | 37 | 3  | 34 | 0   | 38 | 2  | 37 |  | ----    |
| 10 | 26761.510200  | 26761.506000  | -.004200 | .0290     | .00971     | 23 | 1  | 22 | 0   | 23 | 1  | 23 |  | +       |
| 11 | 29083.256198  | 29083.280000  | .023802  | .0300     | .01038     | 24 | 1  | 23 | 0   | 24 | 1  | 24 |  | +       |
| 12 | 31500.721229  | 31500.735000  | .013771  | .0300     | .01107     | 25 | 1  | 24 | 0   | 25 | 1  | 25 |  | +       |
| 13 | 34013.752682  | 34013.748000  | -.004682 | .0290     | .01178     | 26 | 1  | 25 | 0   | 26 | 1  | 26 |  | +       |
| 14 | 36622.186378  | 36622.177000  | -.009378 | .0300     | .01250     | 27 | 1  | 26 | 0   | 27 | 1  | 27 |  | +       |
| 15 | 39325.845945  | 39325.842000  | -.003945 | .0290     | .01326     | 28 | 1  | 27 | 0   | 28 | 1  | 28 |  | +       |
| 16 | 263203.802917 | 263203.703000 | -.099917 | .0310     | .00619     | 19 | 0  | 19 | 0   | 18 | 0  | 18 |  | *****   |
| 17 | 264175.503350 | 264175.413000 | -.090350 | .0300     | .00614     | 19 | 1  | 18 | 0   | 18 | 1  | 17 |  | *****   |
| 18 | 262334.277735 | 262334.185000 | -.092735 | .0300     | .00613     | 19 | 1  | 19 | 0   | 18 | 1  | 18 |  | *****   |
| 19 | 263324.155157 | 263324.083000 | -.072157 | .0300     | .00596     | 19 | 2  | 17 | 0   | 18 | 2  | 16 |  | *****   |
| 20 | 263252.469162 | 263252.379000 | -.090162 | .0310     | .00595     | 19 | 2  | 18 | 0   | 18 | 2  | 17 |  | *****   |
| 21 | 263259.343129 | 263259.274000 | -.069129 | .0300     | .00569     | 19 | 3  | 16 | 0   | 18 | 3  | 15 |  | *****   |
| 22 | 263258.823988 | 263258.737000 | -.086988 | .0310     | .00569     | 19 | 3  | 17 | 0   | 18 | 3  | 16 |  | *****   |
| 23 | 263234.911265 | 263234.851000 | -.060265 | .0300     | .00536     | 19 | 4  | 15 | 0   | 18 | 4  | 14 |  | *****   |
| 24 | 263207.442969 | 263207.427000 | -.015969 | .0300     | .00504     | 19 | 5  | 14 | 0   | 18 | 5  | 13 |  | +       |

|    |               |               |          |       |        |    |    |    |   |    |    |    |   |  |         |  |
|----|---------------|---------------|----------|-------|--------|----|----|----|---|----|----|----|---|--|---------|--|
| 25 | 263175.142285 | 263175.122000 | -.020285 | .0300 | .00479 | 19 | 6  | 13 | 0 | 18 | 6  | 12 | 0 |  | -       |  |
| 26 | 263137.544247 | 263137.556000 | .011753  | .0290 | .00468 | 19 | 7  | 12 | 0 | 18 | 7  | 11 | 0 |  | +       |  |
| 27 | 263094.471964 | 263094.518000 | .046036  | .0300 | .00476 | 19 | 8  | 11 | 0 | 18 | 8  | 10 | 0 |  | ++++++  |  |
| 28 | 263045.850006 | 263045.938000 | .087994  | .0320 | .00503 | 19 | 9  | 10 | 0 | 18 | 9  | 9  | 0 |  | *****   |  |
| 29 | 262991.645915 | 262991.759000 | .113085  | .0330 | .00549 | 19 | 10 | 9  | 0 | 18 | 10 | 8  | 0 |  | *****   |  |
| 30 | 262931.848104 | 262931.989000 | .140896  | .0360 | .00609 | 19 | 11 | 8  | 0 | 18 | 11 | 7  | 0 |  | *****   |  |
| 31 | 262866.456366 | 262866.641000 | .184634  | .0500 | .00685 | 19 | 12 | 7  | 0 | 18 | 12 | 6  | 0 |  | *****   |  |
| 32 | 262795.477373 | 262795.557000 | .079627  | .0310 | .00782 | 19 | 13 | 7  | 0 | 18 | 13 | 6  | 0 |  | *****   |  |
| 33 | 262718.922376 | 262719.046000 | .123624  | .0300 | .00915 | 19 | 14 | 5  | 0 | 18 | 14 | 4  | 0 |  | *****   |  |
| 34 | 262636.805954 | 262636.948000 | .142046  | .0360 | .01100 | 19 | 15 | 5  | 0 | 18 | 15 | 4  | 0 |  | *****   |  |
| 35 | 346114.003047 | 346113.968000 | -.035047 | .0330 | .00715 | 25 | 0  | 25 | 0 | 24 | 0  | 24 | 0 |  | ---     |  |
| 36 | 345023.700794 | 345023.635000 | -.065794 | .0300 | .00708 | 25 | 1  | 25 | 0 | 24 | 1  | 24 | 0 |  | *****   |  |
| 37 | 346235.043114 | 346234.981000 | -.062114 | .0300 | .00687 | 25 | 2  | 24 | 0 | 24 | 2  | 23 | 0 |  | *****   |  |
| 38 | 346397.753753 | 346397.709000 | -.044753 | .0300 | .00688 | 25 | 2  | 23 | 0 | 24 | 2  | 22 | 0 |  | -----   |  |
| 39 | 346262.817986 | 346262.838000 | .020014  | .0440 | .00654 | 25 | 3  | 23 | 0 | 24 | 3  | 22 | 0 |  | +       |  |
| 40 | 346264.871202 | 346264.811000 | -.060202 | .0290 | .00654 | 25 | 3  | 22 | 0 | 24 | 3  | 21 | 0 |  | *****   |  |
| 41 | 346228.024219 | 346227.996000 | -.028219 | .0300 | .00616 | 25 | 4  | 21 | 0 | 24 | 4  | 20 | 0 |  | --      |  |
| 42 | 346190.166321 | 346190.163000 | -.003321 | .0300 | .00578 | 25 | 5  | 20 | 0 | 24 | 5  | 19 | 0 |  | +       |  |
| 43 | 346146.778816 | 346146.765000 | -.013816 | .0290 | .00551 | 25 | 6  | 19 | 0 | 24 | 6  | 18 | 0 |  | +       |  |
| 44 | 346096.793823 | 346096.817000 | .023177  | .0300 | .00542 | 25 | 7  | 18 | 0 | 24 | 7  | 17 | 0 |  | +       |  |
| 45 | 346039.800590 | 346039.812000 | .011410  | .0300 | .00556 | 25 | 8  | 17 | 0 | 24 | 8  | 16 | 0 |  | +       |  |
| 46 | 345975.617727 | 345975.660000 | .042273  | .0300 | .00592 | 25 | 9  | 16 | 0 | 24 | 9  | 15 | 0 |  | +++++   |  |
| 47 | 345904.160215 | 345904.213000 | .052785  | .0310 | .00646 | 25 | 10 | 15 | 0 | 24 | 10 | 14 | 0 |  | +++++++ |  |
| 48 | 345825.389165 | 345825.458000 | .068835  | .0310 | .00715 | 25 | 11 | 14 | 0 | 24 | 11 | 13 | 0 |  | *****   |  |
| 49 | 345739.290233 | 345739.387000 | .096767  | .0300 | .00800 | 25 | 12 | 13 | 0 | 24 | 12 | 12 | 0 |  | *****   |  |
| 50 | 345645.863389 | 345645.969000 | .105611  | .0300 | .00914 | 25 | 13 | 12 | 0 | 24 | 13 | 11 | 0 |  | *****   |  |
| 51 | 345545.117694 | 345545.230000 | .112306  | .0300 | .01076 | 25 | 14 | 11 | 0 | 24 | 14 | 10 | 0 |  | *****   |  |
| 52 | 345437.068454 | 345437.164000 | .095546  | .0500 | .01315 | 25 | 15 | 11 | 0 | 24 | 15 | 10 | 0 |  | +++++++ |  |
| 53 | 345321.735602 | 345321.815000 | .079398  | .0500 | .01658 | 25 | 16 | 9  | 0 | 24 | 16 | 8  | 0 |  | +++++++ |  |
| 54 | 621069.436630 | 621069.325000 | -.111630 | .1550 | .01129 | 45 | 0  | 45 | 0 | 44 | 0  | 44 | 0 |  | -       |  |
| 55 | 619593.477848 | 619593.680000 | .202152  | .1730 | .01142 | 45 | 1  | 45 | 0 | 44 | 1  | 44 | 0 |  | +++     |  |
| 56 | 623873.805972 | 623873.970000 | .164028  | .1660 | .01131 | 45 | 1  | 44 | 0 | 44 | 1  | 43 | 0 |  | ++      |  |
| 57 | 621793.524042 | 621793.581000 | .056958  | .1560 | .01121 | 45 | 2  | 44 | 0 | 44 | 2  | 43 | 0 |  | +       |  |
| 58 | 622699.069640 | 622699.217000 | .147360  | .1620 | .01115 | 45 | 2  | 43 | 0 | 44 | 2  | 42 | 0 |  | ++      |  |
| 59 | 622015.692394 | 622015.477000 | -.215394 | .1650 | .01078 | 45 | 3  | 43 | 0 | 44 | 3  | 42 | 0 |  | ----    |  |
| 60 | 622053.932010 | 622053.723000 | -.209010 | .1650 | .01077 | 45 | 3  | 42 | 0 | 44 | 3  | 41 | 0 |  | ----    |  |
| 61 | 621932.458037 | 621932.076000 | -.382037 | .2110 | .01054 | 45 | 4  | 41 | 0 | 44 | 4  | 40 | 0 |  | -----   |  |
| 62 | 637636.044022 | 637635.953000 | -.091022 | .1540 | .01174 | 46 | 1  | 45 | 0 | 45 | 1  | 44 | 0 |  | +       |  |
| 63 | 636479.335131 | 636478.823000 | -.512131 | .2930 | .01159 | 46 | 2  | 44 | 0 | 45 | 2  | 43 | 0 |  | -----   |  |
| 64 | 648413.672620 | 648413.774000 | .101380  | .1590 | .01217 | 47 | 0  | 47 | 0 | 46 | 0  | 46 | 0 |  | +       |  |
| 65 | 646933.411533 | 646933.525000 | .113467  | .1600 | .01235 | 47 | 1  | 47 | 0 | 46 | 1  | 46 | 0 |  | +       |  |
| 66 | 649232.600803 | 649232.516000 | -.084803 | .1540 | .01211 | 47 | 2  | 46 | 0 | 46 | 2  | 45 | 0 |  | +       |  |
| 67 | 649486.617783 | 649486.220000 | -.397783 | .2150 | .01165 | 47 | 3  | 45 | 0 | 46 | 3  | 44 | 0 |  | -----   |  |
| 68 | 649534.007922 | 649534.079000 | .071078  | .1550 | .01164 | 47 | 3  | 44 | 0 | 46 | 3  | 43 | 0 |  | +       |  |
| 69 | 649307.629731 | 649307.828000 | .198269  | .1640 | .01130 | 47 | 5  | 42 | 0 | 46 | 5  | 41 | 0 |  | ++++    |  |
| 70 | 649216.198854 | 649215.868000 | -.330854 | .2050 | .01134 | 47 | 6  | 41 | 0 | 46 | 6  | 40 | 0 |  | -----   |  |
| 71 | 771059.796906 | 771059.916000 | .119094  | .1560 | .01673 | 56 | 0  | 56 | 0 | 55 | 0  | 55 | 0 |  | +       |  |
| 72 | 769633.754849 | 769634.004000 | .249151  | .1690 | .01712 | 56 | 1  | 56 | 0 | 55 | 1  | 55 | 0 |  | +++++   |  |

|     |                |                |          |       |        |    |   |    |   |    |   |    |   |  |       |  |
|-----|----------------|----------------|----------|-------|--------|----|---|----|---|----|---|----|---|--|-------|--|
| 73  | 774859.906361  | 774859.849000  | -.057361 | .1560 | .01660 | 56 | 1 | 55 | 0 | 55 | 1 | 54 | 0 |  | +     |  |
| 74  | 774019.569402  | 774019.629000  | .059598  | .1530 | .01649 | 56 | 2 | 54 | 0 | 55 | 2 | 53 | 0 |  | +     |  |
| 75  | 772376.318179  | 772376.220000  | -.098179 | .1570 | .01657 | 56 | 2 | 55 | 0 | 55 | 2 | 54 | 0 |  | -     |  |
| 76  | 772916.175748  | 772916.215000  | .039252  | .1530 | .01583 | 56 | 3 | 53 | 0 | 55 | 3 | 52 | 0 |  | +     |  |
| 77  | 772804.244776  | 772804.278000  | .033224  | .1530 | .01585 | 56 | 3 | 54 | 0 | 55 | 3 | 53 | 0 |  | +     |  |
| 78  | 772693.294672  | 772693.237000  | -.057672 | .1560 | .01557 | 56 | 4 | 53 | 0 | 55 | 4 | 52 | 0 |  | +     |  |
| 79  | 772696.100526  | 772696.011000  | -.089526 | .1590 | .01557 | 56 | 4 | 52 | 0 | 55 | 4 | 51 | 0 |  | +     |  |
| 80  | 772574.117259  | 772574.161000  | .043741  | .1530 | .01545 | 56 | 5 | 51 | 0 | 55 | 5 | 50 | 0 |  | +     |  |
| 81  | 772458.418117  | 772458.460000  | .041883  | .1530 | .01556 | 56 | 6 | 50 | 0 | 55 | 6 | 49 | 0 |  | +     |  |
| 82  | 788538.984113  | 788538.959000  | -.025113 | .1550 | .01707 | 57 | 1 | 56 | 0 | 56 | 1 | 55 | 0 |  | +     |  |
| 83  | 786022.699953  | 786022.680000  | -.019953 | .1540 | .01705 | 57 | 2 | 56 | 0 | 56 | 2 | 55 | 0 |  | +     |  |
| 84  | 787743.508681  | 787743.436000  | -.072681 | .1580 | .01697 | 57 | 2 | 55 | 0 | 56 | 2 | 54 | 0 |  | +     |  |
| 85  | 786473.060110  | 786473.063000  | .002890  | .1540 | .01629 | 57 | 3 | 55 | 0 | 56 | 3 | 54 | 0 |  | +     |  |
| 86  | 786595.075164  | 786594.923000  | -.152164 | .1660 | .01627 | 57 | 3 | 54 | 0 | 56 | 3 | 53 | 0 |  | --    |  |
| 87  | 786360.093169  | 786360.137000  | .043831  | .1530 | .01599 | 57 | 4 | 54 | 0 | 56 | 4 | 53 | 0 |  | +     |  |
| 88  | 786363.264007  | 786363.279000  | .014993  | .1540 | .01598 | 57 | 4 | 53 | 0 | 56 | 4 | 52 | 0 |  | +     |  |
| 89  | 786237.330972  | 786237.327000  | -.003972 | .1540 | .01586 | 57 | 5 | 52 | 0 | 56 | 5 | 51 | 0 |  | +     |  |
| 90  | 786118.732149  | 786118.501000  | -.231149 | .1800 | .01598 | 57 | 6 | 51 | 0 | 56 | 6 | 50 | 0 |  | ----  |  |
| 91  | 785993.390136  | 785993.733000  | .342864  | .1860 | .01645 | 57 | 7 | 50 | 0 | 56 | 7 | 49 | 0 |  | +++++ |  |
| 92  | 878194.254114  | 878194.422000  | .167886  | .1550 | .02145 | 64 | 1 | 64 | 0 | 63 | 1 | 63 | 0 |  | +++   |  |
| 93  | 879488.893839  | 879488.570000  | -.323839 | .2280 | .02087 | 64 | 0 | 64 | 0 | 63 | 0 | 63 | 0 |  | ----- |  |
| 94  | 881062.423797  | 881062.215000  | -.208797 | .1600 | .02427 | 64 | 9 | 55 | 0 | 63 | 9 | 54 | 0 |  | ----  |  |
| 95  | 881233.455531  | 881233.417000  | -.038531 | .1540 | .02146 | 64 | 8 | 56 | 0 | 63 | 8 | 55 | 0 |  | +     |  |
| 96  | 881322.947787  | 881322.923000  | -.024787 | .1560 | .02011 | 64 | 2 | 63 | 0 | 63 | 2 | 62 | 0 |  | +     |  |
| 97  | 881389.765345  | 881390.319000  | .553655  | .3410 | .01960 | 64 | 7 | 57 | 0 | 63 | 7 | 56 | 0 |  | +++++ |  |
| 98  | 881534.510081  | 881534.813000  | .302919  | .1760 | .01859 | 64 | 6 | 58 | 0 | 63 | 6 | 57 | 0 |  | +++++ |  |
| 99  | 881674.655130  | 881674.507000  | -.148130 | .1680 | .01828 | 64 | 5 | 59 | 0 | 63 | 5 | 58 | 0 |  | --    |  |
| 100 | 881824.269371  | 881824.365000  | .095629  | .1530 | .01844 | 64 | 4 | 61 | 0 | 63 | 4 | 60 | 0 |  | +     |  |
| 101 | 881831.312726  | 881831.428000  | .115274  | .1540 | .01844 | 64 | 4 | 60 | 0 | 63 | 4 | 59 | 0 |  | +     |  |
| 102 | 881947.523055  | 881947.613000  | .089945  | .1530 | .01894 | 64 | 3 | 62 | 0 | 63 | 3 | 61 | 0 |  | +     |  |
| 103 | 882161.332379  | 882161.567000  | .234621  | .1600 | .01896 | 64 | 3 | 61 | 0 | 63 | 3 | 60 | 0 |  | +++++ |  |
| 104 | 883625.735442  | 883625.969000  | .233558  | .1580 | .02018 | 64 | 2 | 62 | 0 | 63 | 2 | 61 | 0 |  | +++++ |  |
| 105 | 884045.377570  | 884045.325000  | -.052570 | .1590 | .02012 | 64 | 1 | 63 | 0 | 63 | 1 | 62 | 0 |  | +     |  |
| 106 | 893001.639965  | 893001.568000  | -.071965 | .1620 | .02143 | 65 | 0 | 65 | 0 | 64 | 0 | 64 | 0 |  | +     |  |
| 107 | 894653.613815  | 894653.459000  | -.154815 | .1550 | .02527 | 65 | 9 | 56 | 0 | 64 | 9 | 55 | 0 |  | --    |  |
| 108 | 894827.563441  | 894827.475000  | -.088441 | .1550 | .02217 | 65 | 8 | 57 | 0 | 64 | 8 | 56 | 0 |  | +     |  |
| 109 | 894986.696444  | 894986.675000  | -.021444 | .1540 | .02009 | 65 | 7 | 58 | 0 | 64 | 7 | 57 | 0 |  | +     |  |
| 110 | 895134.318319  | 895134.521000  | .202681  | .1610 | .01896 | 65 | 6 | 59 | 0 | 64 | 6 | 58 | 0 |  | ++++  |  |
| 111 | 895277.728179  | 895277.874000  | .145821  | .1550 | .01860 | 65 | 5 | 60 | 0 | 64 | 5 | 59 | 0 |  | ++    |  |
| 112 | 895431.420360  | 895431.377000  | -.043360 | .1580 | .01876 | 65 | 4 | 62 | 0 | 64 | 4 | 61 | 0 |  | +     |  |
| 113 | 895439.255205  | 895439.360000  | .104795  | .1540 | .01876 | 65 | 4 | 61 | 0 | 64 | 4 | 60 | 0 |  | +     |  |
| 114 | 895555.465897  | 895555.261000  | -.204897 | .1820 | .01929 | 65 | 3 | 63 | 0 | 64 | 3 | 62 | 0 |  | ---   |  |
| 115 | 895785.817128  | 895785.663000  | -.154128 | .1750 | .01933 | 65 | 3 | 62 | 0 | 64 | 3 | 61 | 0 |  | --    |  |
| 116 | 897294.267558  | 897294.365000  | .097442  | .1530 | .02064 | 65 | 2 | 63 | 0 | 64 | 2 | 62 | 0 |  | +     |  |
| 117 | 897651.921518  | 897652.273000  | .351482  | .1760 | .02054 | 65 | 1 | 64 | 0 | 64 | 1 | 63 | 0 |  | ***** |  |
| 118 | 1033512.872038 | 1033513.058000 | .185962  | .1530 | .02917 | 75 | 2 | 73 | 0 | 74 | 2 | 72 | 0 |  | ++++  |  |
| 119 | 1033152.687273 | 1033152.913000 | .225727  | .1550 | .02829 | 75 | 1 | 74 | 0 | 74 | 1 | 73 | 0 |  | ++++  |  |
| 120 | 1031613.017407 | 1031613.208000 | .190593  | .1540 | .02712 | 75 | 3 | 72 | 0 | 74 | 3 | 71 | 0 |  | ++++  |  |

|     |                |                |          |       |        |    |   |    |   |    |   |    |   |  |         |  |
|-----|----------------|----------------|----------|-------|--------|----|---|----|---|----|---|----|---|--|---------|--|
| 121 | 1031158.757971 | 1031158.963000 | .205029  | .1560 | .02669 | 75 | 3 | 73 | 0 | 74 | 3 | 72 | 0 |  | ++++    |  |
| 122 | 1031060.709703 | 1031060.950000 | .240297  | .1590 | .02612 | 75 | 4 | 71 | 0 | 74 | 4 | 70 | 0 |  | ++++++  |  |
| 123 | 1031039.869975 | 1031039.963000 | .093025  | .1530 | .02609 | 75 | 4 | 72 | 0 | 74 | 4 | 71 | 0 |  | +       |  |
| 124 | 1030663.687409 | 1030664.009000 | .321591  | .1920 | .02766 | 75 | 6 | 69 | 0 | 74 | 6 | 68 | 0 |  | ++++++  |  |
| 125 | 1030485.737625 | 1030485.760000 | .022375  | .1560 | .03062 | 75 | 7 | 68 | 0 | 74 | 7 | 67 | 0 |  | +       |  |
| 126 | 1030297.415633 | 1030297.260000 | -.155633 | .1530 | .03537 | 75 | 8 | 67 | 0 | 74 | 8 | 66 | 0 |  | --      |  |
| 127 | 1030202.813176 | 1030203.012000 | .198824  | .1560 | .02835 | 75 | 2 | 74 | 0 | 74 | 2 | 73 | 0 |  | ++++    |  |
| 128 | 1027608.407069 | 1027608.503000 | .095931  | .1550 | .03117 | 75 | 0 | 75 | 0 | 74 | 0 | 74 | 0 |  | +       |  |
| 129 | 1026566.499295 | 1026566.705000 | .205705  | .1540 | .03177 | 75 | 1 | 75 | 0 | 74 | 1 | 74 | 0 |  | +++++   |  |
| 130 | 1044551.547831 | 1044551.711000 | .163169  | .1550 | .02780 | 76 | 4 | 73 | 0 | 75 | 4 | 72 | 0 |  | +++     |  |
| 131 | 1044574.351267 | 1044574.664000 | .312733  | .1680 | .02783 | 76 | 4 | 72 | 0 | 75 | 4 | 71 | 0 |  | +++++++ |  |
| 132 | 1254118.846194 | 1254118.810000 | -.036194 | .3630 | .10900 | 92 | 0 | 92 | 0 | 91 | 0 | 91 | 0 |  | +       |  |
| 133 | 1260813.942613 | 1260813.990000 | .047387  | .1630 | .10396 | 92 | 1 | 91 | 0 | 91 | 1 | 90 | 0 |  | +       |  |
| 134 | 1262703.347503 | 1262703.410000 | .062497  | .3100 | .10576 | 92 | 2 | 90 | 0 | 91 | 2 | 89 | 0 |  | +       |  |
| 135 | 1271093.818978 | 1271093.510000 | -.308978 | .3050 | .11288 | 93 | 2 | 92 | 0 | 92 | 2 | 91 | 0 |  | --      |  |

Table S4. Observed rotational transitions of CHD2I in its ground state.

```

*****
*
* THE CHARACTERISTICS OF THE FIT ARE
*
* NUMBER OF DATA POINTS 28194
* NUMBER OF CONSTANTS 12
* DEGREES OF FREEDOM 28182
* CHISQUARE N STD WEIGHT
* rotational 263.5 151 .04153 1.000
* GSCD-v3 3181.2 3009 7.25473 0.020
* GSCD-v6sprime 17539.8 16605 4.52227 0.052
* GSCD-v6dprime 8874.2 8429 4.06798 0.064
* TOTAL 29858.6 28194 .44002
* VARIANCE 1.0293
*
*****

```

```

*****
*
* CALC.DATA OBS.DATA OBS-CALC OBS.ERROR CALC.ERROR IDENTIFICATION
*
*****

```

|    | CALC.DATA     | OBS.DATA      | OBS-CALC | OBS.ERROR | CALC.ERROR |    |   |    |   |    |   |    |   |  |       |  |  |  |       |
|----|---------------|---------------|----------|-----------|------------|----|---|----|---|----|---|----|---|--|-------|--|--|--|-------|
| 1  | 25709.446012  | 25709.500000  | .053988  | .0380     | .00048     | 2  | 1 | 2  | 0 | 1  | 1 | 1  | 0 |  |       |  |  |  | +++++ |
| 2  | 256931.141815 | 256931.137000 | -.004815 | .0150     | .00382     | 20 | 1 | 20 | 0 | 19 | 1 | 19 | 0 |  |       |  |  |  |       |
| 3  | 257825.947304 | 257825.913000 | -.034304 | .0150     | .00347     | 20 | 0 | 20 | 0 | 19 | 0 | 19 | 0 |  | ***** |  |  |  |       |
| 4  | 258012.511053 | 258012.522000 | .010947  | .0160     | .00335     | 20 | 2 | 18 | 0 | 19 | 2 | 17 | 0 |  |       |  |  |  | +     |
| 5  | 257924.329371 | 257924.293000 | -.036371 | .0170     | .00314     | 20 | 3 | 18 | 0 | 19 | 3 | 17 | 0 |  | ***** |  |  |  |       |
| 6  | 257925.418871 | 257925.384000 | -.034871 | .0170     | .00314     | 20 | 3 | 17 | 0 | 19 | 3 | 16 | 0 |  | ***** |  |  |  |       |
| 7  | 257901.742789 | 257901.768000 | .025211  | .0200     | .00294     | 20 | 4 | 16 | 0 | 19 | 4 | 15 | 0 |  |       |  |  |  | ++++  |
| 8  | 257877.381387 | 257877.375000 | -.006387 | .0150     | .00275     | 20 | 5 | 15 | 0 | 19 | 5 | 14 | 0 |  |       |  |  |  | +     |
| 9  | 257849.496641 | 257849.490000 | -.006641 | .0150     | .00265     | 20 | 6 | 14 | 0 | 19 | 6 | 13 | 0 |  |       |  |  |  | +     |
| 10 | 257780.789879 | 257780.806000 | .016121  | .0150     | .00288     | 20 | 8 | 13 | 0 | 19 | 8 | 12 | 0 |  |       |  |  |  | +++   |
| 11 | 257739.579635 | 257739.599000 | .019365  | .0150     | .00320     | 20 | 9 | 11 | 0 | 19 | 9 | 10 | 0 |  |       |  |  |  | ++++  |
| 12 | 322109.284036 | 322109.254000 | -.030036 | .0150     | .00397     | 25 | 0 | 25 | 0 | 24 | 0 | 24 | 0 |  | ***** |  |  |  |       |
| 13 | 323475.633239 | 323475.608000 | -.025239 | .0160     | .00437     | 25 | 1 | 24 | 0 | 24 | 1 | 23 | 0 |  | ----- |  |  |  |       |
| 14 | 321048.563140 | 321048.562000 | -.001140 | .0160     | .00434     | 25 | 1 | 25 | 0 | 24 | 1 | 24 | 0 |  |       |  |  |  | +     |
| 15 | 322478.397563 | 322478.376000 | -.021563 | .0160     | .00385     | 25 | 2 | 23 | 0 | 24 | 2 | 22 | 0 |  | ----- |  |  |  |       |
| 16 | 322270.926065 | 322270.916000 | -.010065 | .0150     | .00377     | 25 | 2 | 24 | 0 | 24 | 2 | 23 | 0 |  |       |  |  |  | -     |
| 17 | 322314.967870 | 322314.951000 | -.016870 | .0150     | .00355     | 25 | 3 | 23 | 0 | 24 | 3 | 22 | 0 |  |       |  |  |  | ---   |
| 18 | 322318.299838 | 322318.285000 | -.014838 | .0150     | .00355     | 25 | 3 | 22 | 0 | 24 | 3 | 21 | 0 |  |       |  |  |  | --    |
| 19 | 322283.333334 | 322283.344000 | .010666  | .0160     | .00331     | 25 | 4 | 21 | 0 | 24 | 4 | 20 | 0 |  |       |  |  |  | +     |
| 20 | 322283.312588 | 322283.310000 | -.002588 | .0150     | .00331     | 25 | 4 | 22 | 0 | 24 | 4 | 21 | 0 |  |       |  |  |  | +     |
| 21 | 322250.999255 | 322250.992000 | -.007255 | .0150     | .00309     | 25 | 5 | 21 | 0 | 24 | 5 | 20 | 0 |  |       |  |  |  | +     |
| 22 | 322215.167133 | 322215.156000 | -.011133 | .0160     | .00298     | 25 | 6 | 19 | 0 | 24 | 6 | 18 | 0 |  |       |  |  |  | -     |
| 23 | 322215.167133 | 322215.149000 | -.018133 | .0160     | .00298     | 25 | 6 | 20 | 0 | 24 | 6 | 19 | 0 |  |       |  |  |  | ---   |
| 24 | 322174.461671 | 322174.465000 | .003329  | .0150     | .00302     | 25 | 7 | 19 | 0 | 24 | 7 | 18 | 0 |  |       |  |  |  | +     |

|    |               |               |          |       |        |    |    |    |   |    |    |    |   |  |         |       |  |
|----|---------------|---------------|----------|-------|--------|----|----|----|---|----|----|----|---|--|---------|-------|--|
| 25 | 322128.352001 | 322128.357000 | .004999  | .0150 | .00324 | 25 | 8  | 18 | 0 | 24 | 8  | 17 | 0 |  |         | +     |  |
| 26 | 322076.599924 | 322076.627000 | .027076  | .0150 | .00360 | 25 | 9  | 17 | 0 | 24 | 9  | 16 | 0 |  | +++++++ |       |  |
| 27 | 322019.089743 | 322019.120000 | .030257  | .0150 | .00403 | 25 | 10 | 16 | 0 | 24 | 10 | 15 | 0 |  | *****   |       |  |
| 28 | 321955.763986 | 321955.795000 | .031014  | .0150 | .00444 | 25 | 11 | 15 | 0 | 24 | 11 | 14 | 0 |  | *****   |       |  |
| 29 | 321886.595774 | 321886.636000 | .040226  | .0150 | .00478 | 25 | 12 | 14 | 0 | 24 | 12 | 13 | 0 |  | *****   |       |  |
| 30 | 321811.575737 | 321811.619000 | .043263  | .0150 | .00499 | 25 | 13 | 13 | 0 | 24 | 13 | 12 | 0 |  | *****   |       |  |
| 31 | 321730.705322 | 321730.749000 | .043678  | .0150 | .00507 | 25 | 14 | 12 | 0 | 24 | 14 | 11 | 0 |  | *****   |       |  |
| 32 | 321643.993162 | 321644.044000 | .050838  | .0150 | .00503 | 25 | 15 | 11 | 0 | 24 | 15 | 10 | 0 |  | *****   |       |  |
| 33 | 321551.452997 | 321551.501000 | .048003  | .0150 | .00503 | 25 | 16 | 10 | 0 | 24 | 16 | 9  | 0 |  | *****   |       |  |
| 34 | 321453.102435 | 321453.130000 | .027565  | .0150 | .00538 | 25 | 17 | 9  | 0 | 24 | 17 | 8  | 0 |  | +++++++ |       |  |
| 35 | 321348.962182 | 321348.980000 | .017818  | .0150 | .00653 | 25 | 18 | 8  | 0 | 24 | 18 | 7  | 0 |  | +++     |       |  |
| 36 | 321239.055557 | 321239.032000 | -.023557 | .0150 | .00875 | 25 | 19 | 7  | 0 | 24 | 19 | 6  | 0 |  | -----   |       |  |
| 37 | 321123.408166 | 321123.360000 | -.048166 | .0210 | .01210 | 25 | 20 | 6  | 0 | 24 | 20 | 5  | 0 |  | *****   |       |  |
| 38 | 641475.849577 | 641475.447000 | -.402577 | .2430 | .01326 | 50 | 0  | 50 | 0 | 49 | 0  | 49 | 0 |  | -----   |       |  |
| 39 | 642998.170785 | 642997.429000 | -.741785 | .4350 | .01238 | 50 | 4  | 47 | 0 | 49 | 4  | 46 | 0 |  | -----   |       |  |
| 40 | 643000.809828 | 643000.067000 | -.742828 | .4360 | .01238 | 50 | 4  | 46 | 0 | 49 | 4  | 45 | 0 |  | -----   |       |  |
| 41 | 643087.685312 | 643087.627000 | -.058312 | .2300 | .01261 | 50 | 3  | 48 | 0 | 49 | 3  | 47 | 0 |  |         | +     |  |
| 42 | 643191.775874 | 643191.518000 | -.257874 | .2420 | .01263 | 50 | 3  | 47 | 0 | 49 | 3  | 46 | 0 |  | ---     |       |  |
| 43 | 644190.474668 | 644190.920000 | .445332  | .2710 | .01320 | 50 | 2  | 48 | 0 | 49 | 2  | 47 | 0 |  |         | +++++ |  |
| 44 | 644918.689860 | 644918.480000 | -.209860 | .2310 | .01317 | 50 | 1  | 49 | 0 | 49 | 1  | 48 | 0 |  | --      |       |  |
| 45 | 640207.353617 | 640206.717000 | -.636617 | .3320 | .01347 | 50 | 1  | 50 | 0 | 49 | 1  | 49 | 0 |  | -----   |       |  |
| 46 | 628780.085310 | 628779.691000 | -.394310 | .2430 | .01258 | 49 | 0  | 49 | 0 | 48 | 0  | 48 | 0 |  | -----   |       |  |
| 47 | 627499.642864 | 627499.027000 | -.615864 | .3230 | .01276 | 49 | 1  | 49 | 0 | 48 | 1  | 48 | 0 |  | -----   |       |  |
| 48 | 632126.837823 | 632126.284000 | -.553823 | .2740 | .01248 | 49 | 1  | 48 | 0 | 48 | 1  | 47 | 0 |  | *****   |       |  |
| 49 | 631354.627204 | 631354.730000 | .102796  | .2310 | .01252 | 49 | 2  | 47 | 0 | 48 | 2  | 46 | 0 |  |         | +     |  |
| 50 | 629929.991793 | 629929.519000 | -.472793 | .2690 | .01245 | 49 | 2  | 48 | 0 | 48 | 2  | 47 | 0 |  | -----   |       |  |
| 51 | 630401.439477 | 630401.621000 | .181523  | .2370 | .01197 | 49 | 3  | 46 | 0 | 48 | 3  | 45 | 0 |  |         | +     |  |
| 52 | 630307.164906 | 630307.295000 | .130094  | .2340 | .01195 | 49 | 3  | 47 | 0 | 48 | 3  | 46 | 0 |  |         | +     |  |
| 53 | 630221.862370 | 630221.524000 | -.338370 | .2540 | .01173 | 49 | 4  | 45 | 0 | 48 | 4  | 44 | 0 |  | -----   |       |  |
| 54 | 630219.568766 | 630219.634000 | .065234  | .2300 | .01173 | 49 | 4  | 46 | 0 | 48 | 4  | 45 | 0 |  |         | +     |  |
| 55 | 630128.624742 | 630128.506000 | -.118742 | .2330 | .01159 | 49 | 5  | 44 | 0 | 48 | 5  | 43 | 0 |  |         | +     |  |
| 56 | 630043.449879 | 630043.524000 | .074121  | .2300 | .01159 | 49 | 6  | 43 | 0 | 48 | 6  | 42 | 0 |  |         | +     |  |
| 57 | 629954.939581 | 629955.027000 | .087419  | .2290 | .01182 | 49 | 7  | 43 | 0 | 48 | 7  | 42 | 0 |  |         | +     |  |
| 58 | 629638.748682 | 629638.697000 | -.051682 | .2400 | .01450 | 49 | 10 | 40 | 0 | 48 | 10 | 39 | 0 |  |         | +     |  |
| 59 | 629512.876578 | 629513.290000 | .413422  | .2370 | .01617 | 49 | 11 | 38 | 0 | 48 | 11 | 37 | 0 |  |         | +++++ |  |
| 60 | 629376.070841 | 629376.424000 | .353159  | .2310 | .01828 | 49 | 12 | 37 | 0 | 48 | 12 | 36 | 0 |  |         | +++++ |  |
| 61 | 772441.836731 | 772442.099000 | .262269  | .2770 | .02087 | 60 | 1  | 59 | 0 | 59 | 1  | 58 | 0 |  |         | ++    |  |
| 62 | 769922.952290 | 769922.966000 | .013710  | .2310 | .02058 | 60 | 2  | 59 | 0 | 59 | 2  | 58 | 0 |  |         | +     |  |
| 63 | 772292.171300 | 772292.205000 | .033700  | .2290 | .02103 | 60 | 2  | 58 | 0 | 59 | 2  | 57 | 0 |  |         | +     |  |
| 64 | 770840.631777 | 770840.778000 | .146223  | .2340 | .01980 | 60 | 3  | 57 | 0 | 59 | 3  | 56 | 0 |  |         | +     |  |
| 65 | 770588.208925 | 770588.294000 | .085075  | .2320 | .01970 | 60 | 3  | 58 | 0 | 59 | 3  | 57 | 0 |  |         | +     |  |
| 66 | 770488.682817 | 770488.823000 | .140183  | .2330 | .01927 | 60 | 4  | 57 | 0 | 59 | 4  | 56 | 0 |  |         | +     |  |
| 67 | 770356.870675 | 770356.964000 | .093325  | .2300 | .01906 | 60 | 5  | 56 | 0 | 59 | 5  | 55 | 0 |  |         | +     |  |
| 68 | 770240.525360 | 770240.227000 | -.298360 | .2620 | .01919 | 60 | 6  | 55 | 0 | 59 | 6  | 54 | 0 |  | ---     |       |  |
| 69 | 770125.059974 | 770125.054000 | -.005974 | .2330 | .01986 | 60 | 7  | 54 | 0 | 59 | 7  | 53 | 0 |  |         | +     |  |
| 70 | 770003.193449 | 770003.277000 | .083551  | .2310 | .02128 | 60 | 8  | 53 | 0 | 59 | 8  | 52 | 0 |  |         | +     |  |
| 71 | 769871.557591 | 769871.895000 | .337409  | .2310 | .02357 | 60 | 9  | 52 | 0 | 59 | 9  | 51 | 0 |  |         | +++++ |  |
| 72 | 769728.436639 | 769728.690000 | .253361  | .2300 | .02679 | 60 | 10 | 51 | 0 | 59 | 10 | 50 | 0 |  |         | +++   |  |

|     |                |                |          |       |        |    |    |    |   |    |    |    |   |  |         |  |
|-----|----------------|----------------|----------|-------|--------|----|----|----|---|----|----|----|---|--|---------|--|
| 73  | 780648.597010  | 780648.337000  | -.260010 | .2300 | .02204 | 61 | 0  | 61 | 0 | 60 | 0  | 60 | 0 |  | ---     |  |
| 74  | 779585.958935  | 779585.751000  | -.207935 | .2340 | .02264 | 61 | 1  | 61 | 0 | 60 | 1  | 60 | 0 |  | --      |  |
| 75  | 793256.382025  | 793255.954000  | -.428025 | .2410 | .02292 | 62 | 0  | 62 | 0 | 61 | 0  | 61 | 0 |  | -----   |  |
| 76  | 792217.189669  | 792217.235000  | .045331  | .2310 | .02356 | 62 | 1  | 62 | 0 | 61 | 1  | 61 | 0 |  | +       |  |
| 77  | 797852.414293  | 797852.105000  | -.309293 | .2320 | .02246 | 62 | 1  | 61 | 0 | 61 | 1  | 60 | 0 |  | -----   |  |
| 78  | 797845.759723  | 797845.672000  | -.087723 | .2310 | .02276 | 62 | 2  | 60 | 0 | 61 | 2  | 59 | 0 |  | +       |  |
| 79  | 795288.837881  | 795288.628000  | -.209881 | .2320 | .02211 | 62 | 2  | 61 | 0 | 61 | 2  | 60 | 0 |  | --      |  |
| 80  | 796310.995395  | 796310.499000  | -.496395 | .2900 | .02128 | 62 | 3  | 59 | 0 | 61 | 3  | 58 | 0 |  | -----   |  |
| 81  | 796015.586563  | 796015.581000  | -.005563 | .2290 | .02112 | 62 | 3  | 60 | 0 | 61 | 3  | 59 | 0 |  | +       |  |
| 82  | 795916.824642  | 795916.698000  | -.126642 | .2330 | .02064 | 62 | 4  | 59 | 0 | 61 | 4  | 58 | 0 |  | +       |  |
| 83  | 795928.508377  | 795928.247000  | -.261377 | .2450 | .02064 | 62 | 4  | 58 | 0 | 61 | 4  | 57 | 0 |  | ---     |  |
| 84  | 795776.656611  | 795776.950000  | .293389  | .2430 | .02041 | 62 | 5  | 58 | 0 | 61 | 5  | 57 | 0 |  | ++++    |  |
| 85  | 795653.920311  | 795654.123000  | .202689  | .2320 | .02058 | 62 | 6  | 57 | 0 | 61 | 6  | 56 | 0 |  | ++      |  |
| 86  | 795533.128638  | 795533.287000  | .158362  | .2290 | .02139 | 62 | 7  | 56 | 0 | 61 | 7  | 55 | 0 |  | +       |  |
| 87  | 795406.269841  | 795406.707000  | .437159  | .2410 | .02307 | 62 | 8  | 55 | 0 | 61 | 8  | 54 | 0 |  | +++++++ |  |
| 88  | 899781.782766  | 899781.442000  | -.340766 | .2510 | .02988 | 70 | 2  | 68 | 0 | 69 | 2  | 67 | 0 |  | -----   |  |
| 89  | 899141.425655  | 899141.411000  | -.014655 | .2420 | .02832 | 70 | 1  | 69 | 0 | 69 | 1  | 68 | 0 |  | +       |  |
| 90  | 897974.255066  | 897974.236000  | -.019066 | .2290 | .02696 | 70 | 3  | 67 | 0 | 69 | 3  | 66 | 0 |  | +       |  |
| 91  | 897449.989565  | 897450.053000  | .063435  | .2310 | .02631 | 70 | 3  | 68 | 0 | 69 | 3  | 67 | 0 |  | +       |  |
| 92  | 897394.500438  | 897394.567000  | .066562  | .2300 | .02549 | 70 | 4  | 66 | 0 | 69 | 4  | 65 | 0 |  | +       |  |
| 93  | 897367.635446  | 897367.404000  | -.231446 | .2420 | .02546 | 70 | 4  | 67 | 0 | 69 | 4  | 66 | 0 |  | --      |  |
| 94  | 897191.719858  | 897192.540000  | .820142  | .4540 | .02513 | 70 | 5  | 66 | 0 | 69 | 5  | 65 | 0 |  | +++++++ |  |
| 95  | 897041.012315  | 897040.918000  | -.094315 | .2400 | .02560 | 70 | 6  | 65 | 0 | 69 | 6  | 64 | 0 |  | +       |  |
| 96  | 896897.469328  | 896897.818000  | .348672  | .2340 | .02728 | 70 | 7  | 64 | 0 | 69 | 7  | 63 | 0 |  | +++++   |  |
| 97  | 896749.734103  | 896750.051000  | .316897  | .2290 | .03050 | 70 | 8  | 63 | 0 | 69 | 8  | 62 | 0 |  | +++++   |  |
| 98  | 896592.478502  | 896592.839000  | .360498  | .2290 | .03539 | 70 | 9  | 62 | 0 | 69 | 9  | 61 | 0 |  | +++++   |  |
| 99  | 896451.481934  | 896451.270000  | -.211934 | .2310 | .02779 | 70 | 2  | 69 | 0 | 69 | 2  | 68 | 0 |  | --      |  |
| 100 | 896422.983640  | 896423.845000  | .861360  | .2610 | .04191 | 70 | 10 | 60 | 0 | 69 | 10 | 59 | 0 |  | *****   |  |
| 101 | 893847.762971  | 893847.591000  | -.171971 | .2290 | .03030 | 70 | 0  | 70 | 0 | 69 | 0  | 69 | 0 |  | -       |  |
| 102 | 893005.995008  | 893005.668000  | -.327008 | .2440 | .03111 | 70 | 1  | 70 | 0 | 69 | 1  | 69 | 0 |  | -----   |  |
| 103 | 887066.278078  | 887066.191000  | -.087078 | .2300 | .02898 | 69 | 2  | 67 | 0 | 68 | 2  | 66 | 0 |  | +       |  |
| 104 | 886512.751805  | 886512.610000  | -.141805 | .2320 | .02765 | 69 | 1  | 68 | 0 | 68 | 1  | 67 | 0 |  | -       |  |
| 105 | 885286.267079  | 885286.326000  | .058921  | .2300 | .02627 | 69 | 3  | 66 | 0 | 68 | 3  | 65 | 0 |  | +       |  |
| 106 | 884796.066301  | 884795.986000  | -.080301 | .2300 | .02573 | 69 | 3  | 67 | 0 | 68 | 3  | 66 | 0 |  | +       |  |
| 107 | 884734.676902  | 884734.844000  | .167098  | .2340 | .02496 | 69 | 4  | 65 | 0 | 68 | 4  | 64 | 0 |  | +       |  |
| 108 | 884710.328914  | 884710.283000  | -.045914 | .2300 | .02494 | 69 | 4  | 66 | 0 | 68 | 4  | 65 | 0 |  | +       |  |
| 109 | 884539.665377  | 884539.674000  | .008623  | .2300 | .02462 | 69 | 5  | 64 | 0 | 68 | 5  | 63 | 0 |  | +       |  |
| 110 | 884392.068268  | 884392.550000  | .481732  | .2580 | .02503 | 69 | 6  | 63 | 0 | 68 | 6  | 62 | 0 |  | +++++++ |  |
| 111 | 884251.491503  | 884251.540000  | .048497  | .2340 | .02657 | 69 | 7  | 62 | 0 | 68 | 7  | 61 | 0 |  | +       |  |
| 112 | 884106.448184  | 884106.944000  | .495816  | .2390 | .02955 | 69 | 8  | 61 | 0 | 68 | 8  | 60 | 0 |  | *****   |  |
| 113 | 883951.823969  | 883952.173000  | .349031  | .2290 | .03410 | 69 | 9  | 60 | 0 | 68 | 9  | 59 | 0 |  | +++++   |  |
| 114 | 883833.668603  | 883833.731000  | .062397  | .2360 | .02714 | 69 | 2  | 68 | 0 | 68 | 2  | 67 | 0 |  | +       |  |
| 115 | 883785.013907  | 883785.245000  | .231093  | .2410 | .04021 | 69 | 10 | 59 | 0 | 68 | 10 | 58 | 0 |  | ++      |  |
| 116 | 881300.447990  | 881300.378000  | -.069990 | .2330 | .02935 | 69 | 0  | 69 | 0 | 68 | 0  | 68 | 0 |  | +       |  |
| 117 | 880433.682820  | 880433.459000  | -.223820 | .2350 | .03015 | 69 | 1  | 69 | 0 | 68 | 1  | 68 | 0 |  | --      |  |
| 118 | 1039073.077188 | 1039073.060000 | -.017188 | .2310 | .03995 | 81 | 2  | 79 | 0 | 80 | 2  | 78 | 0 |  | +       |  |
| 119 | 1031347.842988 | 1031347.857000 | .014012  | .2390 | .04152 | 81 | 0  | 81 | 0 | 80 | 0  | 80 | 0 |  | +       |  |
| 120 | 1030765.312682 | 1030765.439000 | .126318  | .2380 | .04220 | 81 | 1  | 81 | 0 | 80 | 1  | 80 | 0 |  | +       |  |

|     |                |                |          |       |        |     |   |     |   |     |   |     |   |       |  |
|-----|----------------|----------------|----------|-------|--------|-----|---|-----|---|-----|---|-----|---|-------|--|
| 121 | 1024872.285664 | 1024871.754000 | -.531664 | .2370 | .03356 | 80  | 1 | 79  | 0 | 79  | 1 | 78  | 0 | ***** |  |
| 122 | 1024512.439673 | 1024512.568000 | .128327  | .2330 | .03389 | 80  | 3 | 77  | 0 | 79  | 3 | 76  | 0 |       |  |
| 123 | 1047193.967031 | 1047193.879000 | -.088031 | .2300 | .03417 | 82  | 2 | 81  | 0 | 81  | 2 | 80  | 0 |       |  |
| 124 | 1023592.902674 | 1023593.027000 | .124326  | .2310 | .02952 | 80  | 4 | 76  | 0 | 79  | 4 | 75  | 0 |       |  |
| 125 | 1023549.033146 | 1023549.006000 | -.027146 | .2290 | .03090 | 80  | 3 | 78  | 0 | 79  | 3 | 77  | 0 |       |  |
| 126 | 1023526.350417 | 1023526.747000 | .396583  | .2600 | .02933 | 80  | 4 | 77  | 0 | 79  | 4 | 76  | 0 |       |  |
| 127 | 1023305.023115 | 1023305.263000 | .239885  | .2340 | .02890 | 80  | 5 | 75  | 0 | 79  | 5 | 74  | 0 |       |  |
| 128 | 1023302.760508 | 1023302.740000 | -.020508 | .2320 | .02889 | 80  | 5 | 76  | 0 | 79  | 5 | 75  | 0 |       |  |
| 129 | 1022160.321027 | 1022160.098000 | -.223027 | .2300 | .03322 | 80  | 2 | 79  | 0 | 79  | 2 | 78  | 0 |       |  |
| 130 | 1254096.215659 | 1254096.244000 | .028341  | .2380 | .07910 | 99  | 0 | 99  | 0 | 98  | 0 | 98  | 0 |       |  |
| 131 | 1253817.504233 | 1253817.344000 | -.160233 | .2300 | .07897 | 99  | 1 | 99  | 0 | 98  | 1 | 98  | 0 |       |  |
| 132 | 1260666.968062 | 1260666.440000 | -.528062 | .2330 | .05740 | 99  | 1 | 98  | 0 | 98  | 1 | 97  | 0 |       |  |
| 133 | 1258356.725183 | 1258355.897000 | -.828183 | .3280 | .05869 | 99  | 2 | 98  | 0 | 98  | 2 | 97  | 0 |       |  |
| 134 | 1264281.536502 | 1264281.148000 | -.388502 | .2520 | .07186 | 99  | 2 | 97  | 0 | 98  | 2 | 96  | 0 |       |  |
| 135 | 1260584.967325 | 1260585.244000 | .276675  | .2580 | .05585 | 99  | 3 | 97  | 0 | 98  | 3 | 96  | 0 |       |  |
| 136 | 1262905.976284 | 1262905.946000 | -.030284 | .3210 | .07331 | 99  | 3 | 96  | 0 | 98  | 3 | 95  | 0 |       |  |
| 137 | 1260836.538554 | 1260836.394000 | -.144554 | .2360 | .05455 | 99  | 4 | 96  | 0 | 98  | 4 | 95  | 0 |       |  |
| 138 | 1261110.237966 | 1261109.994000 | -.243966 | .2420 | .05690 | 99  | 4 | 95  | 0 | 98  | 4 | 94  | 0 |       |  |
| 139 | 1260534.813410 | 1260534.943000 | .129590  | .2300 | .05509 | 99  | 5 | 95  | 0 | 98  | 5 | 94  | 0 |       |  |
| 140 | 1260549.358062 | 1260549.739000 | .380938  | .2400 | .05519 | 99  | 5 | 94  | 0 | 98  | 5 | 93  | 0 |       |  |
| 141 | 1270681.296649 | 1270681.038000 | -.258649 | .2520 | .06225 | 100 | 2 | 99  | 0 | 99  | 2 | 98  | 0 |       |  |
| 142 | 1271893.317239 | 1271893.994000 | .676761  | .3850 | .11133 | 100 | 9 | 92  | 0 | 99  | 9 | 91  | 0 |       |  |
| 143 | 1272378.730800 | 1272379.299000 | .568200  | .2290 | .07457 | 100 | 7 | 94  | 0 | 99  | 7 | 93  | 0 |       |  |
| 144 | 1272631.495351 | 1272632.038000 | .542649  | .2380 | .06404 | 100 | 6 | 95  | 0 | 99  | 6 | 94  | 0 |       |  |
| 145 | 1272923.428654 | 1272923.191000 | -.237654 | .2670 | .05900 | 100 | 5 | 96  | 0 | 99  | 5 | 95  | 0 |       |  |
| 146 | 1272939.292654 | 1272938.888000 | -.404654 | .3160 | .05911 | 100 | 5 | 95  | 0 | 99  | 5 | 94  | 0 |       |  |
| 147 | 1272955.359663 | 1272955.594000 | .234337  | .2510 | .05949 | 100 | 3 | 98  | 0 | 99  | 3 | 97  | 0 |       |  |
| 148 | 1273520.046154 | 1273520.394000 | .347846  | .2560 | .06089 | 100 | 4 | 96  | 0 | 99  | 4 | 95  | 0 |       |  |
| 149 | 1276679.720036 | 1276679.397000 | -.323036 | .2710 | .07538 | 100 | 2 | 98  | 0 | 99  | 2 | 97  | 0 |       |  |
| 150 | 1278399.133626 | 1278398.845000 | -.288626 | .2370 | .08702 | 101 | 1 | 101 | 0 | 100 | 1 | 100 | 0 |       |  |
| 151 | 1278654.066434 | 1278654.034000 | -.032434 | .2330 | .08721 | 101 | 0 | 101 | 0 | 100 | 0 | 100 | 0 |       |  |

Table S5. Observed rotational transitions of CHD2I in the v3=1 state.

```

*****
*
*   CALC.DATA   OBS.DATA   OBS-CALC  OBS.ERROR  CALC.ERROR  IDENTIFICATION
*
*****
3985  12822.345532  12822.350000  .004468   .0050     .00097     1  0  1  1  0  0  0  1 | |+++++++|
3986  268981.955661 268981.961000  .005339   .1000     .01451     21 0 21  1 20  0 20  1 | |      + |
3987  268052.671622 268052.684000  .012378   .1000     .01940     21 1 21  1 20  1 20  1 | |      + |
3988  270091.420312 270091.387000  -.033312   .1000     .01935     21 1 20  1 20  1 19  1 | |     - |
3989  269075.006470 269075.055000  .048530   .1000     .01363     21 2 20  1 20  2 19  1 | |    |++ |
3990  269198.115081 269198.090000  -.025081   .1000     .01411     21 2 19  1 20  2 18  1 | |      + |
3991  269098.846873 269098.863000  .016127   .1000     .01290     21 3 18  1 20  3 17  1 | |      + |
3992  269097.461091 269097.531000  .069909   .1000     .01290     21 3 19  1 20  3 18  1 | |    |+++++|
3993  269073.048625 269073.034000  -.014625   .1000     .01213     21 4 17  1 20  4 16  1 | |      + |
3994  269046.976574 269047.023000  .046426   .1000     .01160     21 5 17  1 20  5 16  1 | |    |++ |
3995  269017.289034 269017.291000  .001966   .1000     .01152     21 6 15  1 20  6 14  1 | |      + |
3996  268983.175237 268983.090000  -.085237   .1000     .01196     21 7 15  1 20  7 14  1 | |-----|
3997  268944.320864 268944.353000  .032136   .1000     .01280     21 8 13  1 20  8 12  1 | |      |+ |
3998  268900.584805 268900.614000  .029195   .1000     .01379     21 9 13  1 20  9 12  1 | |      |+ |
3999  268851.898444 268851.917000  .018556   .1000     .01479     21 10 11  1 20 10 10  1 | |      + |
4000  268798.227615 268798.233000  .005385   .1000     .01577     21 11 11  1 20 11 10  1 | |      + |
4001  268739.556245 268739.553000  -.003245   .1000     .01723     21 12  9  1 20 12  8  1 | |      + |
4002  268675.878611 268675.845000  -.033611   .1000     .02021     21 13  9  1 20 13  8  1 | |     - |
4003  268607.195377 268607.071000  -.124377   .1000     .02601     21 14  7  1 20 14  6  1 | |*****|
4004  268533.511449 268533.349000  -.162449   .1000     .03563     21 15  7  1 20 15  6  1 | |*****|
4005  268454.834739 268454.558000  -.276739   1.0000     .04984     21 16  5  1 20 16  4  1 | |      + |
4006  345594.045562 345594.019000  -.026562   .1000     .01534     27  0 27  1 26  0 26  1 | |      + |
4007  344478.686497 344478.646000  -.040497   .1000     .02071     27  1 27  1 26  1 26  1 | |     - |
4008  346058.344471 346058.379000  .034529   .1000     .01493     27  2 25  1 26  2 24  1 | |      |+ |
4009  345798.424276 345798.470000  .045724   .1000     .01365     27  2 26  1 26  2 25  1 | |    |++ |
4010  345855.887625 345855.876000  -.011625   .1000     .01256     27  3 25  1 26  3 24  1 | |      + |
4011  345860.762431 345860.718000  -.044431   .1000     .01259     27  3 24  1 26  3 23  1 | |     -- |
4012  345820.006031 345820.031000  .024969   .1000     .01159     27  4 23  1 26  4 22  1 | |      + |
4013  345783.891457 345783.896000  .004543   .1000     .01098     27  5 23  1 26  5 22  1 | |      + |
4014  345744.380859 345744.361000  -.019859   .1000     .01104     27  6 21  1 26  6 20  1 | |      + |
4015  345699.737932 345699.755000  .017068   .1000     .01181     27  7 21  1 26  7 20  1 | |      + |
4016  345649.291046 345649.298000  .006954   .1000     .01298     27  8 19  1 26  8 18  1 | |      + |
4017  345592.735324 345592.738000  .002676   .1000     .01418     27  9 19  1 26  9 18  1 | |      + |
4018  345529.918958 345529.929000  .010042   .1000     .01518     27 10 17  1 26 10 16  1 | |      + |
4019  345460.762486 345460.763000  .000514   .1000     .01620     27 11 17  1 26 11 16  1 | |      + |
4020  345385.224093 345385.228000  .003907   .1000     .01808     27 12 15  1 26 12 14  1 | |      + |
4021  345303.283185 345303.271000  -.012185   .1000     .02255     27 13 15  1 26 13 14  1 | |      + |
4022  345214.931982 345214.814000  -.117982   .1000     .03122     27 14 13  1 26 14 12  1 | |*****|

```
